# Supplementary material for: Transcriptome analysis of the differences between two kinds of Cassia nomame germplasm resources
Source: PeerJ. 2025 Oct 30;13:e20261. doi: 10.7717/peerj.20261 (PMC12579854; doi:10.7717/peerj.20261)
Supplement: Supplemental Information 5 [file peerj-13-20261-s005.xlsx]

## Sheet: Sheet1
Gene ID	Primer name	Sequence (5’ - 3’)	Amplification length
DN67765_c0_g1	DN67765-F	AATTTCTCCGATATCCTTGCAGC	181
	DN67765-R	TGGTAGTGACCACAGGCTTA
DN3407_c0_g1	DN3407-F	TCTCCAGCACAGATGAGAGG	192
	DN3407-R	TTGCAGATGAGTCAACAAGACG
DN10102_c0_g1	DN10102-F	TGAAGAATGCAGAGTCTGAGAA	190
	DN10102-R	TCGCGTTTCCACAGTATACCA
DN2200_c0_g1	DN2200-F	TGTGAATTCTTCAAACTCTGTTTCT	182
	DN2200-R	TCTTGTGTGCATTTTGGTGGC
DN11028_c0_g1	DN11028-F	GGATTCCGCACGAACGAAAC	183
	DN11028-R	CGGCGCGTTCAATAATTCCT
DN4753_c0_g1	DN4753-F	CATGAACTGATGGAGCCAAGG	202
	DN4753-R	ATGAGCCATGCAAAGGCAAG
DN2572_c0_g1	DN2572-F	GGAATTTCGAATTGTTATGAGGGCT	181
	DN2572-R	TCGTAGTAGCAGAGTCTGAAGAA
DN87217_c0_g1	DN87217-F	GGACCTGTTTACTTCCATCGG	180
	DN87217-R	TGTACTGTTTAAAAATTCCACAAGA
DN2768_c0_g1	DN2768-F	ATCCATCGAAGCCTGCAACT	181
	DN2768-R	ACTGTGGACTAAATCAACATCCAAC
DN916_c0_g1	DN916-F	TTGACTCTGCACTGTGTTTCCT	212
	DN916-R	ACAACGCAAGCAAGAGCAAT
DN102857_c0_g1	DN102857-F	GGTCTTCCTCGGCGCT	180
	DN102857-R	CACACATACATACACTCTCTCTC
DN6533_c0_g1	DN6533-F	GGTGGAAGAAAATGGCTCAA	183
	DN6533-R	ACATGTGCGATGCTTAGGTG
