# Supplementary material for: Transcriptome analysis of the differences between two kinds of Cassia nomame germplasm resources
Source: PeerJ. 2025 Oct 30;13:e20261. doi: 10.7717/peerj.20261 (PMC12579854; doi:10.7717/peerj.20261)
Supplement: Supplemental Information 6 [file peerj-13-20261-s006.xlsx]

## Sheet: Sheet1
Sample	RIN value	Reads No.	Bases (bp)	Q30 (bp)	N (%)	Q20 (%)	Q30 (%)
T4_2_1	7.5	40676594	6142165694	5795862725	0.000384	98.16	94.36
T4_2_2	7.3	42731192	6452409992	6085948004	0.00072	98.15	94.32
T4_2_3	7.4	49372240	7455208240	7041048020	0.000733	98.19	94.44
T4_1_1	7.4	42436538	6407917238	6045375811	0.000717	98.17	94.34
T4_1_2	7.6	42085678	6354937378	6000165365	0.000727	98.18	94.41
T4_1_3	7.3	45473972	6866569772	6481463640	0.000714	98.18	94.39
