# Supplementary material for: Transcriptome analysis of the differences between two kinds of Cassia nomame germplasm resources
Source: PeerJ. 2025 Oct 30;13:e20261. doi: 10.7717/peerj.20261 (PMC12579854; doi:10.7717/peerj.20261)
Supplement: Supplemental Information 7 [file peerj-13-20261-s007.xlsx]

## Sheet: Sheet2
Pathway	PathwayID
Ribosome	ko03010
Photosynthesis	ko00195
Flavonoid biosynthesis	ko00941
Carotenoid biosynthesis	ko00906
Photosynthesis - antenna proteins	ko00196
Glyoxylate and dicarboxylate metabolism	ko00630
Phenylpropanoid biosynthesis	ko00940
Carbon fixation in photosynthetic organisms	ko00710
Glycine, serine and threonine metabolism	ko00260
Anthocyanin biosynthesis	ko00942
Nitrogen metabolism	ko00910
Circadian rhythm - plant	ko04712
Glycolysis / Gluconeogenesis	ko00010
alpha-Linolenic acid metabolism	ko00592
Pentose phosphate pathway	ko00030
Tryptophan metabolism	ko00380
Stilbenoid, diarylheptanoid and gingerol biosynthesis	ko00945
Cutin, suberine and wax biosynthesis	ko00073
Sesquiterpenoid and triterpenoid biosynthesis	ko00909
Monoterpenoid biosynthesis	ko00902
Alanine, aspartate and glutamate metabolism	ko00250
Fructose and mannose metabolism	ko00051
Porphyrin metabolism	ko00860
Diterpenoid biosynthesis	ko00904
Lysine biosynthesis	ko00300
Brassinosteroid biosynthesis	ko00905
Pentose and glucuronate interconversions	ko00040
Plant hormone signal transduction	ko04075
Peroxisome	ko04146
Oxidative phosphorylation	ko00190
Lipoic acid metabolism	ko00785
Isoflavonoid biosynthesis	ko00943
Flavone and flavonol biosynthesis	ko00944
Tyrosine metabolism	ko00350
One carbon pool by folate	ko00670
Starch and sucrose metabolism	ko00500
Arginine biosynthesis	ko00220
Vitamin B6 metabolism	ko00750
Mismatch repair	ko03430
Cyanoamino acid metabolism	ko00460
Galactose metabolism	ko00052
Aflatoxin biosynthesis	ko00254
Betalain biosynthesis	ko00965
Limonene and pinene degradation	ko00903
Phenylalanine metabolism	ko00360
Tropane, piperidine and pyridine alkaloid biosynthesis	ko00960
Other types of O-glycan biosynthesis	ko00514
Valine, leucine and isoleucine biosynthesis	ko00290
Fatty acid degradation	ko00071
Selenocompound metabolism	ko00450
Riboflavin metabolism	ko00740
Phagosome	ko04145
Glycerophospholipid metabolism	ko00564
Propanoate metabolism	ko00640
Caffeine metabolism	ko00232
Monobactam biosynthesis	ko00261
Pyruvate metabolism	ko00620
Fatty acid elongation	ko00062
Ascorbate and aldarate metabolism	ko00053
Aminoacyl-tRNA biosynthesis	ko00970
Zeatin biosynthesis	ko00908
Fatty acid biosynthesis	ko00061
Homologous recombination	ko03440
beta-Alanine metabolism	ko00410
Phenylalanine, tyrosine and tryptophan biosynthesis	ko00400
Base excision repair	ko03410
Glycerolipid metabolism	ko00561
Valine, leucine and isoleucine degradation	ko00280
Glucosinolate biosynthesis	ko00966
Biosynthesis of various secondary metabolites - part 3	ko00997
Cysteine and methionine metabolism	ko00270
Biotin metabolism	ko00780
Ubiquinone and other terpenoid-quinone biosynthesis	ko00130
Arginine and proline metabolism	ko00330
Arachidonic acid metabolism	ko00590
DNA replication	ko03030
Histidine metabolism	ko00340
Nucleotide excision repair	ko03420
Pyrimidine metabolism	ko00240
Terpenoid backbone biosynthesis	ko00900
Folate biosynthesis	ko00790
MAPK signaling pathway - plant	ko04016
Linoleic acid metabolism	ko00591
Amino sugar and nucleotide sugar metabolism	ko00520
Nicotinate and nicotinamide metabolism	ko00760
Butanoate metabolism	ko00650
Other glycan degradation	ko00511
N-Glycan biosynthesis	ko00510
Sulfur metabolism	ko00920
SNARE interactions in vesicular transport	ko04130
ABC transporters	ko02010
Glycosphingolipid biosynthesis - globo and isoglobo series	ko00603
Pantothenate and CoA biosynthesis	ko00770
Isoquinoline alkaloid biosynthesis	ko00950
C5-Branched dibasic acid metabolism	ko00660
RNA polymerase	ko03020
Nucleocytoplasmic transport	ko03013
Biosynthesis of unsaturated fatty acids	ko01040
Protein export	ko03060
Taurine and hypotaurine metabolism	ko00430
Ubiquitin mediated proteolysis	ko04120
Protein processing in endoplasmic reticulum	ko04141
Ether lipid metabolism	ko00565
Steroid biosynthesis	ko00100
Glutathione metabolism	ko00480
Plant-pathogen interaction	ko04626
Lysine degradation	ko00310
Citrate cycle (TCA cycle)	ko00020
Various types of N-glycan biosynthesis	ko00513
Purine metabolism	ko00230
Inositol phosphate metabolism	ko00562
Basal transcription factors	ko03022
Autophagy - other	ko04136
Proteasome	ko03050
Sphingolipid metabolism	ko00600
Phosphatidylinositol signaling system	ko04070
Spliceosome	ko03040
RNA degradation	ko03018
Ribosome biogenesis in eukaryotes	ko03008
Endocytosis	ko04144
mRNA surveillance pathway	ko03015

## Sheet: GO term
GO term	GO ID	Category	Ratio	Pvalue	Count
photosynthesis	GO:0015979	BP	74/251	1.1e-20	74
oxidation-reduction process	GO:0055114	BP	295/2329	2.4e-10	295
response to cytokinin	GO:0009735	BP	72/397	7.2e-09	72
pigment biosynthetic process	GO:0046148	BP	53/269	4.3e-08	53
polysaccharide metabolic process	GO:0005976	BP	85/524	7e-08	85
hemicellulose metabolic process	GO:0010410	BP	28/106	1.5e-07	28
response to hormone	GO:0009725	BP	272/2275	3.3e-07	272
chlorophyll biosynthetic process	GO:0015995	BP	21/69	4e-07	21
reductive pentose-phosphate cycle	GO:0019253	BP	13/31	1.1e-06	13
regulation of tetrapyrrole biosynthetic process	GO:1901463	BP	13/32	1.7e-06	13
cell wall organization or biogenesis	GO:0071554	BP	113/815	2.4e-06	113
tetrapyrrole biosynthetic process	GO:0033014	BP	21/83	1.1e-05	21
positive regulation of cofactor metabolic process	GO:0051194	BP	45153	1.6e-05	8
flavonoid metabolic process	GO:0009812	BP	46/269	1.8e-05	46
terpenoid metabolic process	GO:0006721	BP	41/231	2.1e-05	41
flavonoid biosynthetic process	GO:0009813	BP	42/241	2.6e-05	42
cellular carbohydrate biosynthetic process	GO:0034637	BP	46/277	3.8e-05	46
isoprenoid metabolic process	GO:0006720	BP	46/280	5e-05	46
gibberellin mediated signaling pathway	GO:0010476	BP	21/97	0.00013	21
alkaloid metabolic process	GO:0009820	BP	12/41	0.00019	12
terpenoid biosynthetic process	GO:0016114	BP	33/195	0.00032	33
isoprenoid biosynthetic process	GO:0008299	BP	38/243	0.00059	38
secondary metabolic process	GO:0019748	BP	64/481	0.00108	64
phenylpropanoid metabolic process	GO:0009698	BP	32/205	0.00158	32
phytosteroid biosynthetic process	GO:0016129	BP	10/39	0.00195	10
secondary metabolite biosynthetic process	GO:0044550	BP	45/327	0.00293	45
sesquiterpenoid metabolic process	GO:0006714	BP	12/55	0.00318	12
phenylpropanoid biosynthetic process	GO:0009699	BP	25/160	0.00478	25
glycogen biosynthetic process	GO:0005978	BP	8/33	0.00778	8
plastoquinone biosynthetic process	GO:0010236	BP	2/6	0.00855	2
phylloquinone biosynthetic process	GO:0042372	BP	3/9	0.01855	3
carotenoid metabolic process	GO:0016116	BP	9/41	0.00965	9
regulation of DNA binding	GO:0051101	BP	44/991	0.01194	3
flavonol metabolic process	GO:0051554	BP	45/1029	0.02441	4
carotenoid biosynthetic process	GO:0016117	BP	7/37	0.0298	7
regulation of seedling development	GO:1900140	BP	19/133	0.03027	19
quinone biosynthetic process	GO:1901663	BP	5/35	0.03513	5
transcription regulator activity	GO:0140110	MF	175/1414	3.6e-06	175
tetrapyrrole binding	GO:0046906	MF	65/412	4.2e-06	65
pigment binding	GO:0031409	MF	7/14	8.7e-05	7
structural constituent of ribosome	GO:0003735	MF	110/874	0.00013	110
glucosyltransferase activity	GO:0046527	MF	43/272	0.00016	43
chlorophyll binding	GO:0016168	MF	9/26	0.00027	9
allene-oxide cyclase activity	GO:0046423	MF	3/3	0.00071	3
terpene synthase activity	GO:0010333	MF	8/26	0.00143	8
gibberellin oxidase activity	GO:0045543	MF	4/8	0.00331	4
carbohydrate phosphatase activity	GO:0019203	MF	10/43	0.00389	10
sequence-specific DNA binding	GO:0043565	MF	97/840	0.00493	97
germacradienol synthase activity	GO:0034004	MF	3/5	0.00619	3
rRNA binding	GO:0019843	MF	31/222	0.00839	31
fatty acid binding	GO:0005504	MF	2/3	0.02249	2
quinone binding	GO:0048038	MF	4/13	0.02351	4
starch synthase activity	GO:0009011	MF	3/8	0.02827	3
carbon-oxygen lyase activity	GO:0016835	MF	22/165	0.03732	22
gibberellin 3-beta-dioxygenase activity	GO:0016707	MF	3/9	0.03963	3
ADP binding	GO:0043531	MF	21/157	0.03998	21
oxidoreductase activity, quinone or similar compound as acceptor	GO:0016655	MF	14/96	0.04559	14
acid-ammonia (or amide) ligase activity	GO:0016880	MF	5/23	0.04888	5
chloroplast thylakoid	GO:0009535	CC	104/453	6e-09	104
thylakoid	GO:0009579	CC	115/565	1.3e-07	115
photosystem	GO:0009521	CC	25/66	1.3e-07	25
cell wall	GO:0005618	CC	125/1013	9.2e-05	125
plastoglobule	GO:0010287	CC	15/57	9.8e-05	15
external encapsulating structure	GO:0030312	CC	125/1016	0.0001	125
ribosomal subunit	GO:0044391	CC	89/681	0.00014	89
cytosolic ribosome	GO:0022626	CC	92/712	0.00016	92
aleurone grain	GO:0033095	CC	5/10	0.00095	5
organelle subcompartment	GO:0031984	CC	195/1838	0.00426	195
nucleoid	GO:0009295	CC	11/51	0.00453	11
axonemal dynein complex	GO:0005858	CC	3/5	0.00612	3
photosystem I reaction center	GO:0009538	CC	3/5	0.00612	3
inner dynein arm	GO:0036156	CC	3/5	0.00612	3
plant-type cell wall	GO:0009505	CC	41/312	0.0074	41
amyloplast	GO:0009501	CC	9/41	0.00874	9
plastid nucleoid	GO:0042646	CC	7/29	0.01182	7
storage vacuole	GO:0000322	CC	11/68	0.03668	11
plus-end kinesin complex	GO:0005873	CC	2/4	0.04199	2
proton-transporting two-sector ATPase complex	GO:0016469	CC	17/123	0.01492	17

## Sheet: KEGG term
Pathway	KO ID	Catgery	Ratio	Pvalue	DEG_number
Ribosome	ko03010	KEGG	189/1242	4.47588e-08	189
Photosynthesis	ko00195	KEGG	21/50	6.96806e-07	21
Flavonoid biosynthesis	ko00941	KEGG	21/79	5.74292e-06	21
Carotenoid biosynthesis	ko00906	KEGG	12/40	0.000165509	12
Photosynthesis - antenna proteins	ko00196	KEGG	7/16	0.000292431	7
Glyoxylate and dicarboxylate metabolism	ko00630	KEGG	43/278	0.000455421	43
Phenylpropanoid biosynthesis	ko00940	KEGG	35/222	0.00105065	35
Carbon fixation in photosynthetic organisms	ko00710	KEGG	40/267	0.00132356	40
Glycine, serine and threonine metabolism	ko00260	KEGG	22/134	0.00511517	22
Anthocyanin biosynthesis	ko00942	KEGG	2/2	0.00840761	2
Nitrogen metabolism	ko00910	KEGG	14/78	0.010774	14
Circadian rhythm - plant	ko04712	KEGG	14/78	0.010774	14
Glycolysis / Gluconeogenesis	ko00010	KEGG	48/383	0.0161015	48
alpha-Linolenic acid metabolism	ko00592	KEGG	14/84	0.0200243	14
Pentose phosphate pathway	ko00030	KEGG	23/161	0.0216409	23
Plant hormone signal transduction	ko04075	KEGG	33/302	0.0166131	33
Tryptophan metabolism	ko00380	KEGG	20/143	0.0373269	20
Stilbenoid, diarylheptanoid and gingerol biosynthesis	ko00945	KEGG	5/21	0.037852	5
Cutin, suberine and wax biosynthesis	ko00073	KEGG	6/28	0.0383461	6
Sesquiterpenoid and triterpenoid biosynthesis	ko00909	KEGG	5/23	0.0438002	5
