# Supplementary material for: Transcriptome analysis of the differences between two kinds of Cassia nomame germplasm resources
Source: PeerJ. 2025 Oct 30;13:e20261. doi: 10.7717/peerj.20261 (PMC12579854; doi:10.7717/peerj.20261)
Supplement: Supplemental Information 8 [file peerj-13-20261-s008.xlsx]

## Sheet: Sheet1
Block Type	96-Well 0.2-mL Block
Chemistry	SYBR_GREEN
Date Created	2023-11-15 11:14:53 AM PST
Experiment Barcode
Experiment Comment
Experiment File Name	D:\LIB\2023-11-15_1070CE.eds
Experiment Name	2023-11-15_1070CE
Experiment Run End Time	2023-11-14 20:06:43 PM PST
Experiment Type	Comparative Cт (ΔΔCт)
Instrument Name	272520930
Instrument Serial Number	272520930
Instrument Type	QuantStudio™ 5 System
Passive Reference	ROX
Post-read Stage/Step
Pre-read Stage/Step
Quantification Cycle Method	Ct
Signal Smoothing On	true
Stage where Melt Analysis is performed	Stage3
Stage/ Cycle where Ct Analysis is performed	Stage2, Step2
User Name
Well	Well Position	Omit	Sample Name	Target Name	Task	Reporter	Quencher	Quantity	Quantity Mean	Quantity SD	RQ	RQ Min	RQ Max	CT	Ct Mean	Ct SD
1	A1	FALSE	T4-2	NEI	UNKNOWN	SYBR	None							17.886	17.8283	0.113795
2	A2	FALSE	T4-2	NEI	UNKNOWN	SYBR	None							17.827	17.8283	0.113795
3	A3	FALSE	T4-2	NEI	UNKNOWN	SYBR	None							17.7718	17.8283	0.113795
4	A4	FALSE	T4-1	NEI	UNKNOWN	SYBR	None							16.3089	16.424	0.235947
5	A5	FALSE	T4-1	NEI	UNKNOWN	SYBR	None							16.2849	16.424	0.235947
6	A6	FALSE	T4-1	NEI	UNKNOWN	SYBR	None							16.6782	16.424	0.235947
7	A7	FALSE	T4-2	DN67765_c0_g1(bHLH)	UNKNOWN	SYBR	None				1	0.660861	1.51318	21.5069	21.4941	0.399386
8	A8	FALSE	T4-2	DN67765_c0_g1(bHLH)	UNKNOWN	SYBR	None				1	0.660861	1.51318	21.4941	21.4941	0.399386
9	A9	FALSE	T4-2	DN67765_c0_g1(bHLH)	UNKNOWN	SYBR	None				1	0.660861	1.51318	21.4812	21.4941	0.399386
10	A10	FALSE	T4-1	DN67765_c0_g1(bHLH)	UNKNOWN	SYBR	None				0.8118	0.463364	1.42225	21.0551	21.056	0.194412
11	A11	FALSE	T4-1	DN67765_c0_g1(bHLH)	UNKNOWN	SYBR	None				0.8118	0.463364	1.42225	21.076	21.056	0.194412
12	A12	FALSE	T4-1	DN67765_c0_g1(bHLH)	UNKNOWN	SYBR	None				0.8118	0.463364	1.42225	21.037	21.056	0.194412
13	B1	FALSE	T4-2	DN3407_c2_g1(bHLH)	UNKNOWN	SYBR	None				0.399507	0.292075	0.546454	22.6305	22.6405	0.169578
14	B2	FALSE	T4-2	DN3407_c2_g1(bHLH)	UNKNOWN	SYBR	None				0.399507	0.292075	0.546454	22.663	22.6405	0.169578
15	B3	FALSE	T4-2	DN3407_c2_g1(bHLH)	UNKNOWN	SYBR	None				0.399507	0.292075	0.546454	22.6279	22.6405	0.169578
16	B4	FALSE	T4-1	DN3407_c2_g1(bHLH)	UNKNOWN	SYBR	None				3.1831e-05	1.5188e-05	6.67111e-05	21.9406	21.8485	0.504992
17	B5	FALSE	T4-1	DN3407_c2_g1(bHLH)	UNKNOWN	SYBR	None				3.1831e-05	1.5188e-05	6.67111e-05	21.6486	21.8485	0.504992
18	B6	FALSE	T4-1	DN3407_c2_g1(bHLH)	UNKNOWN	SYBR	None				3.1831e-05	1.5188e-05	6.67111e-05	21.9564	21.8485	0.504992
19	B7	FALSE	T4-2	DN10102_c0_g2(bHLH)	UNKNOWN	SYBR	None				3.87383	1.53893	9.75133	22.5855	22.5658	0.202944
20	B8	FALSE	T4-2	DN10102_c0_g2(bHLH)	UNKNOWN	SYBR	None				3.87383	1.53893	9.75133	22.5849	22.5658	0.202944
21	B9	FALSE	T4-2	DN10102_c0_g2(bHLH)	UNKNOWN	SYBR	None				3.87383	1.53893	9.75133	22.5271	22.5658	0.202944
22	B10	FALSE	T4-1	DN10102_c0_g2(bHLH)	UNKNOWN	SYBR	None				1.78309	1.00499	3.1636	18.8647	18.9749	0.241471
23	B11	FALSE	T4-1	DN10102_c0_g2(bHLH)	UNKNOWN	SYBR	None				1.78309	1.00499	3.1636	18.9947	18.9749	0.241471
24	B12	FALSE	T4-1	DN10102_c0_g2(bHLH)	UNKNOWN	SYBR	None				1.78309	1.00499	3.1636	19.0652	18.9749	0.241471
25	C1	FALSE	T4-2	DN2200_c0_g1(C2H2)	UNKNOWN	SYBR	None				2.22248	1.1534	4.28249	20.933	21.2235	0.973191
26	C2	FALSE	T4-2	DN2200_c0_g1(C2H2)	UNKNOWN	SYBR	None				2.22248	1.1534	4.28249	21.234	21.2235	0.973191
27	C3	FALSE	T4-2	DN2200_c0_g1(C2H2)	UNKNOWN	SYBR	None				2.22248	1.1534	4.28249	21.5035	21.2235	0.973191
28	C4	FALSE	T4-1	DN2200_c0_g1(C2H2)	UNKNOWN	SYBR	None				1.89891	1.2561	2.87068	19.983	20.2222	0.418362
29	C5	FALSE	T4-1	DN2200_c0_g1(C2H2)	UNKNOWN	SYBR	None				1.89891	1.2561	2.87068	20.1923	20.2222	0.418362
30	C6	FALSE	T4-1	DN2200_c0_g1(C2H2)	UNKNOWN	SYBR	None				1.89891	1.2561	2.87068	20.4914	20.2222	0.418362
31	C7	FALSE	T4-2	DN11028_c0_g1(C2H2)	UNKNOWN	SYBR	None				1	0.668	1.49701	23.5233	23.4649	4.08201
32	C8	FALSE	T4-2	DN11028_c0_g1(C2H2)	UNKNOWN	SYBR	None				1	0.668	1.49701	23.4575	23.4649	4.08201
33	C9	FALSE	T4-2	DN11028_c0_g1(C2H2)	UNKNOWN	SYBR	None				1	0.668	1.49701	23.4139	23.4649	4.08201
34	C10	FALSE	T4-1	DN11028_c0_g1(C2H2)	UNKNOWN	SYBR	None							24.6741	24.6839	5.08064
35	C11	FALSE	T4-1	DN11028_c0_g1(C2H2)	UNKNOWN	SYBR	None							24.6649	24.6839	5.08064
36	C12	FALSE	T4-1	DN11028_c0_g1(C2H2)	UNKNOWN	SYBR	None							24.7128	24.6839	5.08064
37	D1	FALSE	T4-2	DN4753_c1_g1(C2H2)	UNKNOWN	SYBR	None							26.4939	26.475	2.03278
38	D2	FALSE	T4-2	DN4753_c1_g1(C2H2)	UNKNOWN	SYBR	None							26.4504	26.475	2.03278
39	D3	FALSE	T4-2	DN4753_c1_g1(C2H2)	UNKNOWN	SYBR	None							26.4808	26.475	2.03278
40	D4	FALSE	T4-1	DN4753_c1_g1(C2H2)	UNKNOWN	SYBR	None							26.866	26.9071	0.551007
41	D5	FALSE	T4-1	DN4753_c1_g1(C2H2)	UNKNOWN	SYBR	None							27.0566	26.9071	0.551007
42	D6	FALSE	T4-1	DN4753_c1_g1(C2H2)	UNKNOWN	SYBR	None							26.7986	26.9071	0.551007
43	D7	FALSE	T4-2	DN2572_c2_g1(ERF)	UNKNOWN	SYBR	None							20.4737	20.4647	0.984036
44	D8	FALSE	T4-2	DN2572_c2_g1(ERF)	UNKNOWN	SYBR	None							20.3375	20.4647	0.984036
45	D9	FALSE	T4-2	DN2572_c2_g1(ERF)	UNKNOWN	SYBR	None							20.5831	20.4647	0.984036
46	D10	FALSE	T4-1	DN2572_c2_g1(ERF)	UNKNOWN	SYBR	None							19.7463	19.6647	0.180166
47	D11	FALSE	T4-1	DN2572_c2_g1(ERF)	UNKNOWN	SYBR	None							19.6947	19.6647	0.180166
48	D12	FALSE	T4-1	DN2572_c2_g1(ERF)	UNKNOWN	SYBR	None							19.5532	19.6647	0.180166
49	E1	FALSE	T4-2	DN87217_c0_g1(ERF)	UNKNOWN	SYBR	None							25.5216	25.4696	0.862309
50	E2	FALSE	T4-2	DN87217_c0_g1(ERF)	UNKNOWN	SYBR	None							25.5037	25.4696	0.862309
51	E3	FALSE	T4-2	DN87217_c0_g1(ERF)	UNKNOWN	SYBR	None							25.3834	25.4696	0.862309
52	E4	FALSE	T4-1	DN87217_c0_g1(ERF)	UNKNOWN	SYBR	None				3.58923	1.45877	8.83114	25.5957	25.5839	0.284881
53	E5	FALSE	T4-1	DN87217_c0_g1(ERF)	UNKNOWN	SYBR	None				3.58923	1.45877	8.83114	25.5544	25.5839	0.284881
54	E6	FALSE	T4-1	DN87217_c0_g1(ERF)	UNKNOWN	SYBR	None				3.58923	1.45877	8.83114	25.6018	25.5839	0.284881
55	E7	FALSE	T4-2	DN2768_c1_g1(MYB)	UNKNOWN	SYBR	None				3.58923	1.45877	8.83114	30.5051	30.4559	0.160124
56	E8	FALSE	T4-2	DN2768_c1_g1(MYB)	UNKNOWN	SYBR	None				1	0.612323	1.63313	30.4306	30.4559	0.160124
57	E9	FALSE	T4-2	DN2768_c1_g1(MYB)	UNKNOWN	SYBR	None				1	0.612323	1.63313	30.4321	30.4559	0.160124
58	E10	FALSE	T4-1	DN2768_c1_g1(MYB)	UNKNOWN	SYBR	None				1	0.612323	1.63313	30.1572	30.0524	0.322426
59	E11	FALSE	T4-1	DN2768_c1_g1(MYB)	UNKNOWN	SYBR	None				1	0.612323	1.63313	29.8046	30.0524	0.322426
60	E12	FALSE	T4-1	DN2768_c1_g1(MYB)	UNKNOWN	SYBR	None				0.0190579	0.000595635	0.609776	30.1953	30.0524	0.322426
61	F1	FALSE	T4-2	DN916_c2_g1(MYB)	UNKNOWN	SYBR	None				0.0190579	0.000595635	0.609776	22.0152	22.2235	0.0757534
62	F2	FALSE	T4-2	DN916_c2_g1(MYB)	UNKNOWN	SYBR	None				0.0190579	0.000595635	0.609776	22.0845	22.2235	0.0757534
63	F3	FALSE	T4-2	DN916_c2_g1(MYB)	UNKNOWN	SYBR	None				0.0190579	0.000595635	0.609776	22.5708	22.2235	0.0757534
64	F4	FALSE	T4-1	DN916_c2_g1(MYB)	UNKNOWN	SYBR	None							18.6047	18.8702	0.824708
65	F5	FALSE	T4-1	DN916_c2_g1(MYB)	UNKNOWN	SYBR	None							18.9465	18.8702	0.824708
66	F6	FALSE	T4-1	DN916_c2_g1(MYB)	UNKNOWN	SYBR	None							19.0595	18.8702	0.824708
67	F7	FALSE	T4-2	DN102857_c0_g1(MYB)	UNKNOWN	SYBR	None							20.5225	20.4651	0.237114
68	F8	FALSE	T4-2	DN102857_c0_g1(MYB)	UNKNOWN	SYBR	None							20.4406	20.4651	0.237114
69	F9	FALSE	T4-2	DN102857_c0_g1(MYB)	UNKNOWN	SYBR	None							20.4321	20.4651	0.237114
70	F10	FALSE	T4-1	DN102857_c0_g1(MYB)	UNKNOWN	SYBR	None							20.3142	20.2841	0.526995
71	F11	FALSE	T4-1	DN102857_c0_g1(MYB)	UNKNOWN	SYBR	None							20.7405	20.2841	0.526995
72	F12	FALSE	T4-1	DN102857_c0_g1(MYB)	UNKNOWN	SYBR	None							19.7976	20.2841	0.526995
73	G1	FALSE	T4-2	DN6533_c0_g3(NF-YA)	UNKNOWN	SYBR	None							19.5049	19.4494	0.656869
74	G2	FALSE	T4-2	DN6533_c0_g3(NF-YA)	UNKNOWN	SYBR	None							19.5047	19.4494	0.656869
75	G3	FALSE	T4-2	DN6533_c0_g3(NF-YA)	UNKNOWN	SYBR	None							19.3386	19.4494	0.656869
76	G4	FALSE	T4-1	DN6533_c0_g3(NF-YA)	UNKNOWN	SYBR	None							20.3132	20.247	0.460231
77	G5	FALSE	T4-1	DN6533_c0_g3(NF-YA)	UNKNOWN	SYBR	None							20.4941	20.247	0.460231
78	G6	FALSE	T4-1	DN6533_c0_g3(NF-YA)	UNKNOWN	SYBR	None							19.9336	20.247	0.460231
79	G7	FALSE	T4-2	DN6533_c0_g3(NF-YA)	UNKNOWN	SYBR	None							19.4497	19.4494	0.427022
80	G8	FALSE	T4-2	DN6533_c0_g3(NF-YA)	UNKNOWN	SYBR	None							19.4505	19.4494	0.427022
81	G9	FALSE	T4-2	DN6533_c0_g3(NF-YA)	UNKNOWN	SYBR	None							19.4481	19.4494	0.427022
82	G10	FALSE	T4-1	DN6533_c0_g3(NF-YA)	UNKNOWN	SYBR	None							20.2494	20.247	0.320735
83	G11	FALSE	T4-1	DN6533_c0_g3(NF-YA)	UNKNOWN	SYBR	None							20.2366	20.247	0.320735
84	G12	FALSE	T4-1	DN6533_c0_g3(NF-YA)	UNKNOWN	SYBR	None							20.2548	20.247	0.320735
